# Supplementary material
Source: Elsevier journal article supplement (https://www.sciencedirect.com/science/article/pii/S166526811932246X)
Supplement: mmc1 [file S166526811932246X:mmc1.docx]

**Supplemental Table 1. Search strategy applied to all databases**

| **Search terms** | **Search strategy** |
| --- | --- |
| **Chronic liver disease** | ("Liver Diseases"[Mesh] OR "Liver Diseases" OR "Liver Disease" OR "Liver Dysfunction" OR "Liver Dysfunctions" OR "Liver Cirrhosis" OR "Liver Cirrhoses" OR "Hepatic Cirrhosis" OR "Hepatic Cirrhoses" OR "Liver Fibroses" OR "Liver Fibrosis" OR "Fatty Liver" OR "Steatohepatitis" OR "Steatohepatitides" OR "Steatosis of Liver" OR "Visceral Steatosis" OR "Visceral Steatoses" OR "Liver Steatosis" OR "Liver Steatoses" OR "Liver Cirrhosis"[Mesh] OR "Fatty Liver"[Mesh])  "Hepatitis, Alcoholic"[Mesh] OR "Hepatitis, Alcoholic" OR “Alcoholic Hepatitis” OR “Chronic Alcoholic Hepatitis” OR “Chronic Alcoholic Hepatitides”  "Hepatitis, Chronic"[Mesh] OR "Hepatitis, Chronic” OR “Chronic Hepatitis” OR “Cryptogenic Chronic Hepatitis” OR “Chronic Active Hepatitis” OR “Chronic Persistent Hepatitides” OR “Chronic Persistent Hepatitis” OR “Chronic Hepatitides”  "Hepatitis, Viral, Human"[Mesh] OR “Viral hematitis” OR “viral hepatitides” OR “Infectious Hepatitis” OR “Infectious Hepatitides” OR "Hepatitis B"[Mesh] OR "Hepatitis B" OR "Hepatitis B, Chronic"[Mesh] OR "Chronic B Hepatitis” OR "Chronic Hepatitis B” OR “Hepatitis C"[Mesh] OR “Hepatitis C" OR “Parenterally-Transmitted Non-A, Non-B Hepatitis” OR “Parenterally-Transmitted Non-A” OR “Parenterally-Transmitted Non-B” OR “Parenterally Transmitted Non A, Non B Hepatitis” OR “PT-NANBH” OR “Hepatitis, Viral, Non-A, Non-B, Parenterally-Transmitted” OR "Hepatitis C, Chronic"[Mesh] OR “Chronic Hepatitis C” OR “Chronic C Hepatitis” OR "Hepatitis D"[Mesh] OR "Hepatitis D" OR “Delta Hepatitis” OR “Delta Infection” OR “Delta Superinfections” OR “Delta Superinfection” OR “Amazon Black Fever” OR “Labrea Disease” OR “Labrea Diseases”  "Hepatic Insufficiency"[Mesh] OR "Hepatic Insufficiency" OR “Liver Insufficiency” OR "Liver Failure"[Mesh] OR "Liver Failure" OR “Hepatic Failure”  "End Stage Liver Disease"[Mesh] OR "End Stage Liver Disease" OR “Chronic Liver Failure” OR “Chronic Liver Failures”  "Hepatomegaly"[Mesh] OR "Hepatomegaly" OR “Enlarged Liver”  "Liver Cirrhosis, Alcoholic"[Mesh] OR “Alcoholic Liver Cirrhosis” OR “Alcoholic Cirrhosis” OR “Alcoholic Hepatic Cirrhosis”  "Liver Cirrhosis, Biliary"[Mesh] OR “Biliary Cirrhosis” OR “Obstructive Liver Cirrhosis” OR “Secondary Biliary Cirrhosis” OR “Cholangitis Chronic” OR “Chronic Cholangitis” OR “Primary Biliary Cirrhosis”  "Liver Diseases, Alcoholic"[Mesh] OR “Alcoholic Liver Diseases” OR “Alcoholic Liver Disease”  "Liver Neoplasms"[Mesh] OR "Liver Neoplasms" OR “Liver Neoplasm” OR “Hepatic Neoplasms” OR “Hepatic Neoplasm” OR “Cancer of Liver” OR “Hepatocellular Cancer” OR “Hepatocellular Cancers” OR “Hepatic Cancer” OR “Hepatic Cancers” OR “Liver Cancer” OR “Liver Cancers” OR “Cancer of the Liver”  "Adenoma, Liver Cell"[Mesh] OR “Liver Cell Adenoma” OR “Liver Cell Adenomas” OR “Benign Hepatoma” OR “Benign Hepatomas” OR “Hepatocellular Adenoma” OR “Hepatocellular Adenomas”  "Carcinoma, Hepatocellular"[Mesh] OR "Carcinoma, Hepatocellular" OR “Hepatocellular Carcinomas” OR “Adult Liver Cancer” OR “Adult Liver Cancers” OR “Liver Cell Carcinoma” OR “Liver Cell Carcinomas” OR “Hepatocellular Carcinoma” OR “Hepatoma” OR “Hepatomas” |
| **Zinc** | ("Zinc"[Mesh] OR "Zinc" OR "Zinc Sulfate"[Mesh] OR "Zinc Sulfate" OR "Zincteral" OR "Zinc Sulfate, Heptahydrate" OR "Heptahydrate Zinc Sulfate" OR "Heptahydrated Zinc Sulfate" OR "Zinc Heptahydrate Sulfate") |
| **Haynes filter for randomized controlled trials** | ((clinical[Title/Abstract] AND trial[Title/Abstract]) OR clinical trials as topic[MeSH Terms] OR clinical trial[Publication Type] OR random*[Title/Abstract] OR random allocation[MeSH Terms] OR therapeutic use [MeSH Subheading]) |
